# Supplementary material
Source: HighWire-hosted journal article supplement (https://clincancerres.aacrjournals.org/content/suppl/2008/12/04/14.23.7604)
Supplement: Supplementary_Table_S1.pdf [file Supplementary_Table_S1.pdf]

**sTable 1. GALR1 Gene Methylation Status in HNSCC Cell Lines and Nonmalignant Cell Lines.**

|         | UM-SCC & UT-SCC |             |            |       | Nonmalignant cell lines |             |            |       |
|---------|-----------------|-------------|------------|-------|-------------------------|-------------|------------|-------|
|         | Hyper-M         | Partially-M | Un-M       | Total | Hyper-M                 | Partially-M | Un-M       | Total |
| GALR1   | 14 (19.4%)      | 24 (33.3%)  | 34 (47.2%) | 72    | 0 (0.0%)                | 2 (10.0%)   | 18 (90.0%) | 20    |
| p16     | 22 (30.6%)      | 6 (8.3%)    | 44 (61.1%) | 72    | 0 (0.0%)                | 0 (0.0%)    | 20 (100%)  | 20    |
| RASSF1A | 10 (13.9%)      | 12 (16.7%)  | 50 (69.4%) | 72    | 0 (0.0%)                | 1 (5.0%)    | 19 (95.0%) | 20    |

Hyper-M = Hyper-Methylated; Partially-M = Partially-Methylated; Un-M = Un-Methylated
